# Supplementary material for: In Pichia pastoris, growth rate regulates protein synthesis and secretion, mating and stress response
Source: PubMed Central journal article supplement — Biotechnol J. 2013 Dec 10;9(4):511–25. doi: 10.1002/biot.201300334 (PMC4162992; doi:10.1002/biot.201300334), 2013-12-10
Supplement: biot0009-0511-SD4.pdf [file biot0009-0511-SD4.pdf]

Supporting Information for DOI 10.1002/biot.201300334

***Pichia pastoris* growth rate regulates protein synthesis and secretion, mating, and stress response**

---

*Corinna Rebnegger, Alexandra B. Graf, Minoska Valli, Matthias G. Steiger, Brigitte Gasser, Michael Maurer, Diethard Mattanovich*

## Supplementary Material

### Supporting Figures

**Figure S1:** Morphology of *P. pastoris* grown at different specific growth rates between  $0.015 \text{ h}^{-1}$  and  $0.15 \text{ h}^{-1}$ . At the lowest  $\mu$  most cells have an elongated shape, a phenotype that almost disappears at faster growth.

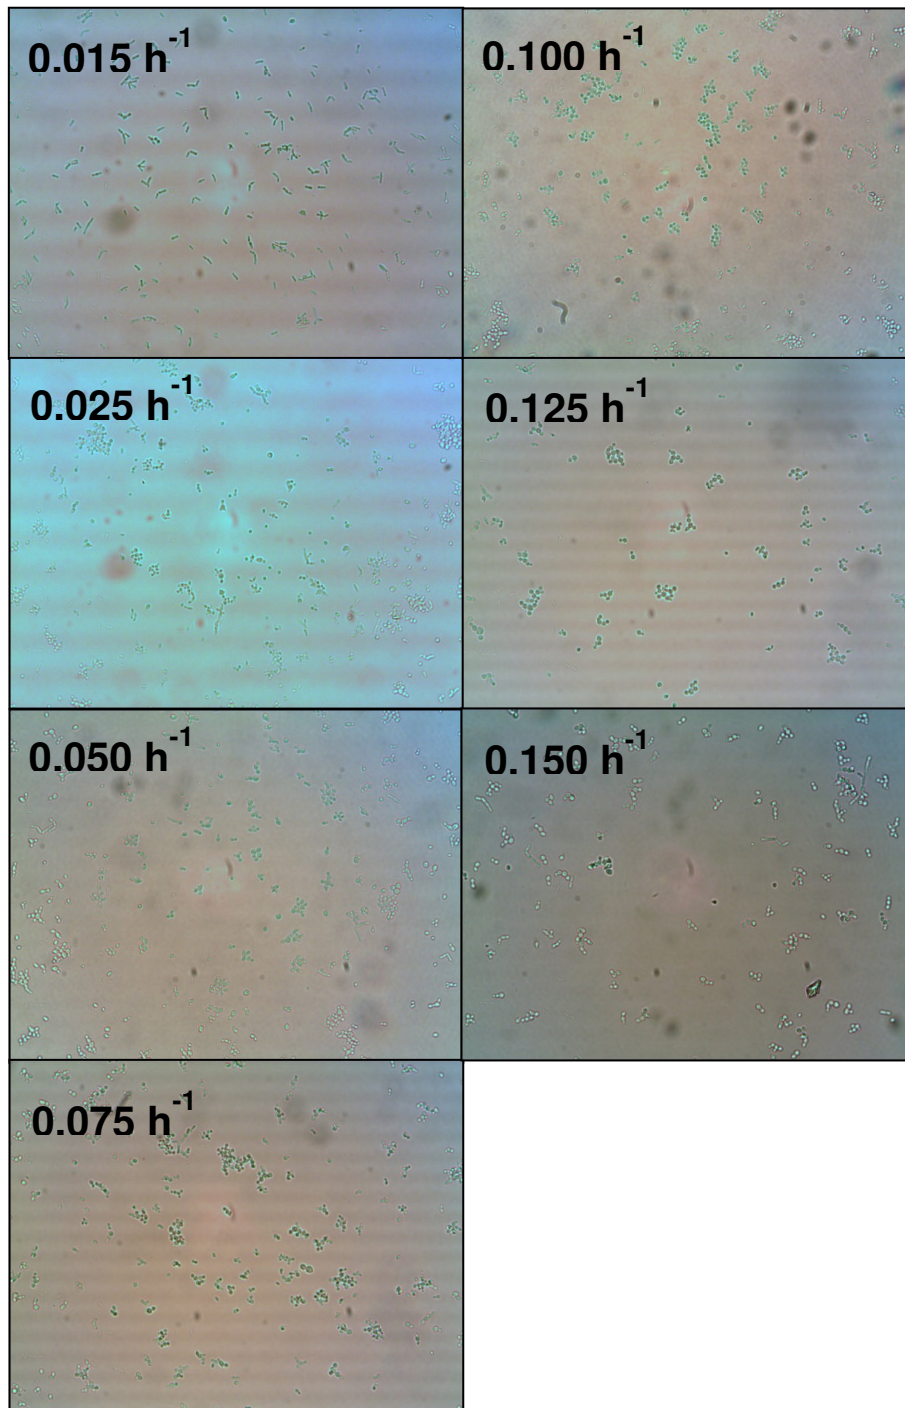

## Supporting Tables

**Table S1:** Core set of common upregulated genes. A conserved set of genes upregulated with increasing growth in *S. cerevisiae* (Fazio et al. 2008) and regulation of their *P. pastoris* homologs. For references see main manuscript.

| <i>ORF</i> | <i>S.c. Gene Name</i> | <i>P.p. Gene Name</i> | <i>Short Description</i>                                                            | <i>Regulation in P.p. (Cluster #)</i> |
|------------|-----------------------|-----------------------|-------------------------------------------------------------------------------------|---------------------------------------|
| YBL039C    | URA7                  | URA7                  | Major CTP synthase isozyme                                                          | Up (11)                               |
| YBR189W    | RPS9B                 | RPS9B                 | Protein component of the small (40S) ribosomal subunit                              | Up (12)                               |
| YBR191W    | RPL21A                | RPL21B                | Protein component of the large (60S) ribosomal subunit                              | Up (4)                                |
| YCR034W    | FEN1                  | FEN1                  | Fatty acid elongase, involved in sphingolipid biosynthesis                          | Up (4)                                |
| YDL083C    | RPS16B                | RPS16B                | Protein component of the small (40S) ribosomal subunit                              | Not significant                       |
| YDR064W    | RPS13                 | RPS13                 | Protein component of the small (40S) ribosomal subunit                              | Not significant                       |
| YDR144C    | MKC7                  | MKC7                  | GPI-anchored aspartyl protease (yapsin) involved in protein processing              | Slightly up (1)                       |
| YDR321W    | ASP1                  | ASP1                  | Cytosolic L-asparaginase, involved in asparagine catabolism                         | Up (6)                                |
| YEL040W    | UTR2                  | UTR2                  | Cell wall protein that functions in the transfer of chitin to beta(1-6)glucan       | Up (12)                               |
| YER009W    | NTF2                  | NTF2                  | Nuclear envelope protein                                                            | Up (11)                               |
| YGL076C    | RPL7A                 | RPL7A                 | Protein component of the large (60S) ribosomal subunit                              | Up (6)                                |
| YKL081W    | TEF4                  | PAS_chr3_1071         | Translation elongation factor EF-1 gamma                                            | Down (9)                              |
| YLR186W    | EMG1                  | EMG1                  | Protein required for the maturation of the 18S rRNA and for 40S ribosome production | Up (6)                                |
| YLR325C    | RPL38                 | RPL38                 | Protein component of the large (60S) ribosomal subunit                              | Up (6)                                |
| YLR372W    | SUR4                  | SUR4                  | Elongase, involved in fatty acid and sphingolipid biosynthesis                      | Up (6)                                |
| YML036W    | CGI121                | n.a.                  | Protein involved in telomere uncapping and elongation                               | --                                    |
| YML063W    | RPS1B                 | RPS1B                 | Ribosomal protein 10 (rp10) of the small (40S) subunit                              | Up (12)                               |
| YMR318C    | ADH6                  | ADH6                  | NADPH-dependent medium chain alcohol dehydrogenase                                  | Up (6)                                |
| YOL040C    | RPS15                 | RPS15                 | Protein component of the small (40S) ribosomal subunit                              | Up (4)                                |
| YOL120C    | RPL18A                | RPL18B                | Protein component of the large (60S) ribosomal subunit                              | Up (12)                               |
| YPL144W    | YPL144W               | n.a.                  | Putative protein of unknown function                                                | --                                    |

**Table S2:** Core set of common downregulated genes. A conserved set of genes downregulated with increasing growth in *S. cerevisiae* (Fazio et al. 2008) and regulation of their *P. pastoris* homologs. For references see main manuscript.

| <i>ORF</i> | <i>S.c. Gene Name</i> | <i>P.p. Gene Name</i> | <i>Description</i>                                                                                      | <i>Regulation in P.p. (Cluster #)</i> |
|------------|-----------------------|-----------------------|---------------------------------------------------------------------------------------------------------|---------------------------------------|
| YOL153C    | YOL153C               | n.a.                  | Hypothetical protein                                                                                    | --                                    |
| YLR345W    | YLR345W               | PAS_chr4_0266         | Similar to 6-phosphofructo-2-kinase/fructose-2,6-bisphosphatase                                         | Down (7)                              |
| YGR070W    | ROM1                  | PAS_chr3_1175         | GDP/GTP exchange protein (GEP) for Rho1p                                                                | Down (9)                              |
| YMR090W    | YMR090W               | PAS_FragB_0034        | Putative protein of unknown function with similarity to DTDP-glucose 4,6-dehydratases                   | Down (7)                              |
| YDR262W    | YDR262W               | PAS_chr4_0303         | Putative protein of unknown function                                                                    | Down (5)                              |
| YGL121C    | GPG1                  | n.a.                  | Proposed gamma subunit of the heterotrimeric G protein that interacts with the receptor Grp1p           | --                                    |
| YIL107C    | PFK26                 | PFK26-1               | 6-phosphofructo-2-kinase                                                                                | Down (5)                              |
|            |                       | PFK26-2               |                                                                                                         | slightly up (11)                      |
| YGR087C    | PDC6                  | PDC1                  | Minor isoform of pyruvate decarboxylase, key enzyme in alcoholic fermentation                           | Slightly up (1)                       |
| YIL017C    | VID28                 | VID28                 | Protein involved in proteasome-dependent catabolite degradation of fructose-1,6-bisphosphatase (FBPase) | unregulated                           |
| YGL227W    | VID30                 | n.a.                  | Protein involved in proteasome-dependent catabolite degradation of fructose-1,6-bisphosphatase (FBPase) | --                                    |

**Table S3:** Reporter metabolites. Reporter metabolites were calculated using the BioMet toolbox. For each condition, adjusted p-values out of the transcriptional comparison (each dilution rate setpoint against the highest specific growth rate of  $0.15 \text{ h}^{-1}$ ) were used for the calculation of Z scores for each reporter metabolite. Additionally reporter metabolites were calculated for the comparisons of  $\mu=0.015 \text{ h}^{-1}$  to  $0.025 \text{ h}^{-1}$  and  $0.025 \text{ h}^{-1}$  to  $0.05 \text{ h}^{-1}$ .

Condition 0.015 / 0.15, sorted by descending Z-score and compared with the Z-score of the other conditions

Z-scores are coloured in light yellow (Z-Score > 1) until dark red (Z-Score > 2.5)

| Number of neighbors | Reporter Metabolite                                                                   | Condition D (h <sup>-1</sup> ) (D (h <sup>-1</sup> )) <sup>1</sup> |              |             |              |            |              |
|---------------------|---------------------------------------------------------------------------------------|--------------------------------------------------------------------|--------------|-------------|--------------|------------|--------------|
|                     |                                                                                       | 0.015 / 0.15                                                       | 0.025 / 0.15 | 0.05 / 0.15 | 0.075 / 0.15 | 0.1 / 0.15 | 0.125 / 0.15 |
|                     | <b>Number of significantly regulated genes in the metabolic network</b>               | 330                                                                | 313          | 259         | 175          | 66         | 0            |
| 10                  | S-Adenosyl-L-homocysteine[c]                                                          | 2.71                                                               | 1.88         | 0.95        | 1.32         | 0.42       | -            |
| 3                   | Adenylyl sulfate[c]                                                                   | 2.52                                                               | 2.11         | 1.78        | 2.05         | 2.35       | -            |
| 8                   | L-Methionine[c]                                                                       | 2.36                                                               | 0.59         | 1.08        | 1.63         | 0.15       | -            |
| 4                   | Urea[c]                                                                               | 2.07                                                               | 1.57         | -0.37       | 0.41         | -1.37      | -            |
| 6                   | L-Asparagine[c]                                                                       | 2.00                                                               | 0.91         | 1.85        | 2.25         | 1.51       | -            |
| 2                   | 3'-Phosphoadenylyl sulfate[c]                                                         | 1.96                                                               | 1.41         | 1.03        | 1.23         | 1.47       | -            |
| 3                   | 2-Oxobutanate[c]                                                                      | 1.95                                                               | 2.10         | 2.12        | 2.25         | 2.66       | -            |
| 10                  | Succinate[c]                                                                          | 1.94                                                               | -0.62        | 1.02        | -0.38        | -0.62      | -            |
| 39                  | L-Glutamate[c]                                                                        | 1.94                                                               | 1.76         | 2.12        | 2.24         | 1.81       | -            |
| 3                   | Adenosine[c]                                                                          | 1.89                                                               | 2.27         | 1.83        | 1.33         | 0.96       | -            |
| 6                   | L-Homocysteine[c]                                                                     | 1.88                                                               | 2.47         | 2.22        | 1.10         | 0.91       | -            |
| 1                   | Methanol[p]                                                                           | 1.88                                                               | 1.77         | 2.03        | 1.62         | 2.37       | -            |
| 14                  | S-Adenosyl-L-methionine[c]                                                            | 1.86                                                               | 2.13         | 1.56        | 2.26         | 1.92       | -            |
| 9                   | L-Glutamate[m]                                                                        | 1.84                                                               | 1.54         | 2.18        | 1.87         | 0.31       | -            |
| 5                   | S-Adenosyl-L-methionine[m]                                                            | 1.78                                                               | 2.06         | 1.35        | 0.84         | 1.18       | -            |
| 3                   | L-Phenylalanine[c]                                                                    | 1.73                                                               | 1.65         | 1.89        | 2.23         | 1.96       | -            |
| 5                   | Phosphatidylcholine[c]                                                                | 1.72                                                               | -0.28        | -0.44       | 0.01         | -0.28      | -            |
| 5                   | L-Arginine[c]                                                                         | 1.72                                                               | 1.16         | 0.49        | 0.98         | 0.14       | -            |
| 5                   | Ferrocyclochrome c[m]                                                                 | 1.70                                                               | 0.86         | 0.80        | -0.82        | -1.01      | -            |
| 2                   | (S)-Lactate[c]                                                                        | 1.70                                                               | 0.67         | 1.12        | 1.28         | 1.89       | -            |
| 3                   | Inositol 1-phosphate[c]                                                               | 1.70                                                               | 0.01         | -0.09       | -0.14        | -0.19      | -            |
| 3                   | Malonyl-CoA[c]                                                                        | 1.69                                                               | 1.10         | 0.62        | 0.63         | -0.42      | -            |
| 2                   | Putrescine[c]                                                                         | 1.67                                                               | 1.61         | 1.69        | 1.48         | 2.25       | -            |
| 2                   | L-Citrulline[c]                                                                       | 1.67                                                               | 2.11         | 2.07        | 1.98         | 0.64       | -            |
| 6                   | Ferricytochrome c[m]                                                                  | 1.66                                                               | 1.15         | 0.66        | -0.73        | -0.89      | -            |
| 2                   | H2O2[m]                                                                               | 1.66                                                               | 1.48         | 1.28        | 1.23         | 1.05       | -            |
| 2                   | 1-(5-Phospho-D-ribose)-ATP[c]                                                         | 1.66                                                               | 1.80         | 2.07        | 2.11         | 2.09       | -            |
| 2                   | alpha-D-Glucose[e]                                                                    | 1.65                                                               | 0.58         | 0.66        | -0.69        | -0.03      | -            |
| 2                   | H2O[e]                                                                                | 1.61                                                               | -0.35        | 1.27        | 1.37         | 1.64       | -            |
| 2                   | 5-(5-Phospho-D-ribosylaminoformimino)-1-(5-phosphoribosyl)-imidazole-4-carboxamide[c] | 1.60                                                               | 0.80         | -0.19       | 0.11         | -0.06      | -            |
| 2                   | Cadaverine[c]                                                                         | 1.57                                                               | 0.49         | 0.05        | 0.25         | 0.77       | -            |
| 2                   | Formaldehyde[c]                                                                       | 1.56                                                               | 0.24         | -0.15       | 0.14         | 0.28       | -            |
| 3                   | Hypoxanthine[c]                                                                       | 1.56                                                               | 2.00         | 1.47        | 1.28         | 2.24       | -            |
| 7                   | L-Ornithine[c]                                                                        | 1.55                                                               | 1.20         | 0.82        | 1.34         | 0.24       | -            |

Condition 0.025 / 0.15, sorted by descending Z-score and compared with the Z-score of the other conditions

Z-scores are coloured in light yellow (Z-Score > 1) until dark red (Z-Score > 2.5)

|                                                                  |                                        | Condition D (h <sup>-1</sup> ) (D (h <sup>-1</sup> )) <sup>1</sup> |              |             |              |            |              |
|------------------------------------------------------------------|----------------------------------------|--------------------------------------------------------------------|--------------|-------------|--------------|------------|--------------|
|                                                                  |                                        | 0.015 / 0.15                                                       | 0.025 / 0.15 | 0.05 / 0.15 | 0.075 / 0.15 | 0.1 / 0.15 | 0.125 / 0.15 |
| Number of significantly regulated genes in the metabolic network |                                        | 330                                                                | 313          | 259         | 175          | 66         | 0            |
|                                                                  | <b>Reporter Metabolite</b>             |                                                                    |              |             |              |            |              |
| 6                                                                | L-Homocysteine[c]                      | 1.88                                                               | 2.47         | 2.22        | 1.10         | 0.91       | -            |
| 3                                                                | Adenosine[c]                           | 1.89                                                               | 2.27         | 1.83        | 1.33         | 0.96       | -            |
| 14                                                               | S-Adenosyl-L-methionine[c]             | 1.86                                                               | 2.13         | 1.56        | 2.26         | 1.92       | -            |
| 2                                                                | L-Citrulline[c]                        | 1.67                                                               | 2.11         | 2.07        | 1.98         | 0.64       | -            |
| 3                                                                | Adenylyl sulfate[c]                    | 2.52                                                               | 2.11         | 1.78        | 2.05         | 2.35       | -            |
| 3                                                                | 2-Oxobutanoate[c]                      | 1.95                                                               | 2.10         | 2.12        | 2.25         | 2.56       | -            |
| 5                                                                | S-Adenosyl-L-methionine[m]             | 1.78                                                               | 2.06         | 1.35        | 0.84         | 1.18       | -            |
| 3                                                                | Hypoxanthine[c]                        | 1.56                                                               | 2.00         | 1.47        | 1.28         | 2.24       | -            |
| 2                                                                | Urate[c]                               | 1.54                                                               | 1.98         | 1.92        | 1.41         | 2.26       | -            |
| 3                                                                | Nicotinate[c]                          | 1.41                                                               | 1.92         | 2.22        | 2.47         | 2.41       | -            |
| 10                                                               | S-Adenosyl-L-homocysteine[c]           | 2.71                                                               | 1.88         | 0.95        | 1.32         | 0.42       | -            |
| 2                                                                | 1-(5-Phospho-D-ribose)-ATP[c]          | 1.66                                                               | 1.80         | 2.07        | 2.11         | 2.09       | -            |
| 1                                                                | Methanol[p]                            | 1.88                                                               | 1.77         | 2.03        | 1.62         | 2.37       | -            |
| 2                                                                | N-(L-Arginino)succinate[c]             | 0.81                                                               | 1.76         | 1.47        | 1.17         | 1.88       | -            |
| 39                                                               | L-Glutamate[c]                         | 1.94                                                               | 1.76         | 2.12        | 2.24         | 1.81       | -            |
| 2                                                                | 5-Hydroxyisourate[c]                   | 0.92                                                               | 1.75         | 1.94        | 1.97         | 1.86       | -            |
| 2                                                                | N-Acetyl-L-glutamate 5-semialdehyde[m] | 1.35                                                               | 1.69         | 1.23        | 1.92         | 2.14       | -            |
| 2                                                                | NH3[m]                                 | 1.39                                                               | 1.69         | 1.48        | 1.56         | 0.85       | -            |
| 2                                                                | 4-Phospho-L-aspartate[c]               | 1.51                                                               | 1.68         | 1.77        | 1.71         | 2.26       | -            |
| 2                                                                | Acetaldehyde[m]                        | 1.52                                                               | 1.68         | 1.52        | 0.81         | -1.32      | -            |
| 3                                                                | L-Phenylalanine[c]                     | 1.73                                                               | 1.65         | 1.89        | 2.23         | 1.96       | -            |
| 3                                                                | S-Adenosyl-L-homocysteine[m]           | 1.19                                                               | 1.64         | 0.85        | 0.80         | 0.97       | -            |
| 2                                                                | alpha-D-Ribose 1-phosphate[c]          | 1.47                                                               | 1.63         | 1.75        | 1.78         | 2.08       | -            |
| 3                                                                | 5'-Methylthioadenosine[c]              | 0.44                                                               | 1.62         | 1.61        | 1.90         | 3.00       | -            |
| 2                                                                | Putrescine[c]                          | 1.67                                                               | 1.61         | 1.69        | 1.48         | 2.25       | -            |
| 3                                                                | Acyl-carrier protein[c]                | 1.53                                                               | 1.61         | 1.60        | 1.51         | 0.77       | -            |
| 1                                                                | Nicotinate[m]                          | 1.09                                                               | 1.60         | 1.65        | 1.85         | 2.13       | -            |
| 1                                                                | Nicotinamide[c]                        | 1.09                                                               | 1.60         | 1.65        | 1.85         | 2.13       | -            |
| 1                                                                | Nicotinamide[m]                        | 1.09                                                               | 1.60         | 1.65        | 1.85         | 2.13       | -            |
| 2                                                                | 3-Phosphonoxyruvate[c]                 | 1.37                                                               | 1.60         | 1.73        | 1.60         | 2.40       | -            |

Condition 0.05 / 0.15, sorted by descending Z-score and compared with the Z-score of the other conditions

Z-scores are coloured in light yellow (Z-Score>1) until dark red (Z-Score > 2.5)

|                                                                  |                               | Condition D (h <sup>-1</sup> ) (D (h <sup>-1</sup> )) <sup>1</sup> |              |             |              |            |              |
|------------------------------------------------------------------|-------------------------------|--------------------------------------------------------------------|--------------|-------------|--------------|------------|--------------|
|                                                                  |                               | 0.015 / 0.15                                                       | 0.025 / 0.15 | 0.05 / 0.15 | 0.075 / 0.15 | 0.1 / 0.15 | 0.125 / 0.15 |
| Number of significantly regulated genes in the metabolic network |                               | 330                                                                | 313          | 259         | 175          | 66         | 0            |
| Number of neighbors                                              | Reporter Metabolite           |                                                                    |              |             |              |            |              |
| 6                                                                | UDP-glucose[c]                | 1.11                                                               | 1.46         | 2.26        | 2.51         | 2.57       | -            |
| 3                                                                | Nicotinate[c]                 | 1.41                                                               | 1.92         | 2.22        | 2.47         | 2.41       | -            |
| 6                                                                | L-Homocysteine[c]             | 1.88                                                               | 2.47         | 2.22        | 1.10         | 0.91       | -            |
| 9                                                                | L-Glutamate[m]                | 1.84                                                               | 1.54         | 2.18        | 1.87         | 0.31       | -            |
| 39                                                               | L-Glutamate[c]                | 1.94                                                               | 1.75         | 2.12        | 2.24         | 1.81       | -            |
| 3                                                                | 2-Oxobutanoate[c]             | 1.95                                                               | 2.10         | 2.12        | 2.25         | 2.56       | -            |
| 2                                                                | 1-(5-Phospho-D-ribose)-ATP[c] | 1.66                                                               | 1.80         | 2.07        | 2.11         | 2.09       | -            |
| 2                                                                | L-Citrulline[c]               | 1.67                                                               | 2.11         | 2.07        | 1.98         | 0.64       | -            |
| 1                                                                | Methanol[p]                   | 1.88                                                               | 1.77         | 2.03        | 1.62         | 2.37       | -            |
| 2                                                                | 5-Hydroxyisourate[c]          | 0.92                                                               | 1.75         | 1.94        | 1.97         | 1.86       | -            |
| 5                                                                | L-Valine[c]                   | 1.28                                                               | 0.28         | 1.94        | 2.51         | 0.49       | -            |
| 2                                                                | Urate[c]                      | 1.54                                                               | 1.98         | 1.92        | 1.41         | 2.26       | -            |
| 3                                                                | L-Phenylalanine[c]            | 1.73                                                               | 1.65         | 1.89        | 2.23         | 1.96       | -            |
| 5                                                                | L-Isoleucine[c]               | 1.19                                                               | 0.23         | 1.88        | 2.15         | 0.44       | -            |
| 6                                                                | L-Asparagine[c]               | 2.00                                                               | 0.91         | 1.85        | 2.25         | 1.51       | -            |
| 3                                                                | Adenosine[c]                  | 1.89                                                               | 2.27         | 1.83        | 1.33         | 0.96       | -            |
| 2                                                                | Allantoinate[c]               | 1.39                                                               | 1.55         | 1.83        | 1.46         | -1.32      | -            |
| 3                                                                | S-Adenosylmethioninamine[c]   | 0.44                                                               | 1.41         | 1.83        | 1.98         | 2.78       | -            |
| 4                                                                | L-Leucine[c]                  | 0.70                                                               | 0.72         | 1.79        | 1.92         | 0.99       | -            |
| 3                                                                | Adenylyl sulfate[c]           | 2.52                                                               | 2.11         | 1.78        | 2.05         | 2.35       | -            |
| 4                                                                | H+[p]                         | -0.51                                                              | 0.86         | 1.77        | 2.01         | 1.06       | -            |
| 2                                                                | 4-Phospho-L-aspartate[c]      | 1.51                                                               | 1.68         | 1.77        | 1.71         | 2.26       | -            |
| 2                                                                | Acetate[e]                    | 1.45                                                               | -0.07        | 1.77        | 2.28         | 2.35       | -            |
| 2                                                                | alpha-D-Ribose 1-phosphate[c] | 1.47                                                               | 1.63         | 1.75        | 1.78         | 2.08       | -            |
| 6                                                                | L-Threonine[c]                | 0.60                                                               | 0.42         | 1.73        | 2.68         | -0.58      | -            |
| 2                                                                | 3-Phosphooxypyruvate[c]       | 1.37                                                               | 1.60         | 1.73        | 1.60         | 2.40       | -            |
| 4                                                                | L-Histidine[c]                | 0.71                                                               | 1.30         | 1.71        | 2.23         | 1.39       | -            |
| 1                                                                | (R)-Lactate[e]                | 1.43                                                               | 1.34         | 1.70        | 1.68         | 2.07       | -            |
| 1                                                                | (S)-Lactate[e]                | 1.43                                                               | 1.34         | 1.70        | 1.68         | 2.07       | -            |
| 1                                                                | Pyruvate[e]                   | 1.43                                                               | 1.34         | 1.70        | 1.68         | 2.07       | -            |
| 2                                                                | Putrescine[c]                 | 1.67                                                               | 1.61         | 1.69        | 1.48         | 2.25       | -            |
| 6                                                                | L-Tyrosine[c]                 | 1.54                                                               | 0.57         | 1.69        | 1.98         | 1.13       | -            |
| 1                                                                | Dethiobiotin[c]               | 0.73                                                               | 1.19         | 1.68        | 2.04         | 2.20       | -            |
| 1                                                                | Sulfur[c]                     | 0.73                                                               | 1.19         | 1.68        | 2.04         | 2.20       | -            |
| 1                                                                | 5'-Deoxyadenosine[c]          | 0.73                                                               | 1.19         | 1.68        | 2.04         | 2.20       | -            |
| 1                                                                | Nicotinate[m]                 | 1.09                                                               | 1.60         | 1.65        | 1.85         | 2.13       | -            |
| 1                                                                | Nicotinamide[c]               | 1.09                                                               | 1.60         | 1.65        | 1.85         | 2.13       | -            |
| 1                                                                | Nicotinamide[m]               | 1.09                                                               | 1.60         | 1.65        | 1.85         | 2.13       | -            |
| 10                                                               | L-Serine[c]                   | 1.06                                                               | 1.24         | 1.61        | 1.43         | 0.40       | -            |
| 3                                                                | 5'-Methylthioadenosine[c]     | 0.44                                                               | 1.62         | 1.61        | 1.90         | 3.00       | -            |
| 72                                                               | Diphosphate[c]                | 1.40                                                               | 1.09         | 1.60        | 1.54         | 1.44       | -            |
| 3                                                                | Acyl-carrier protein[c]       | 1.53                                                               | 1.61         | 1.60        | 1.51         | 0.77       | -            |



Condition 0.075 / 0.15, sorted by descending Z-score and compared with the Z-score of the other conditions

Z-scores are coloured in light yellow (Z-Score>1) until dark red (Z-Score > 2.5)

| #Feature                  | Reporter Metabolite | Condition D (h <sup>-1</sup> ) (D (h <sup>-1</sup> )) <sup>1</sup> |              |              |             |              |            |
|---------------------------|---------------------|--------------------------------------------------------------------|--------------|--------------|-------------|--------------|------------|
|                           |                     | Number of significantly regulated genes in the metabolic network   | 0.015 / 0.15 | 0.025 / 0.15 | 0.05 / 0.15 | 0.075 / 0.15 | 0.1 / 0.15 |
|                           |                     | 330                                                                | 313          | 259          | 175         | 66           | 0          |
| L-Threonine[c]            | 6                   | 0.80                                                               | 0.42         | 1.73         | 2.68        | -0.58        | -          |
| L-Valine[c]               | 5                   | 1.28                                                               | 0.28         | 1.94         | 2.51        | 0.49         | -          |
| UDP-glucose[c]            | 6                   | 1.11                                                               | 1.46         | 2.26         | 2.51        | 2.57         | -          |
| Nicotinate[c]             | 3                   | 1.41                                                               | 1.92         | 2.22         | 2.47        | 2.41         | -          |
| L-Glutamine[c]            | 18                  | 0.73                                                               | 0.57         | 1.53         | 2.31        | 1.21         | -          |
| Acetate[e]                | 2                   | 1.45                                                               | -0.07        | 1.77         | 2.28        | 2.35         | -          |
| S-Adenosyl-L-methionine   | 14                  | 1.86                                                               | 2.13         | 1.56         | 2.26        | 1.92         | -          |
| L-Asparagine[c]           | 6                   | 2.00                                                               | 0.91         | 1.85         | 2.25        | 1.51         | -          |
| 2-Oxobutanoate[c]         | 3                   | 1.95                                                               | 2.10         | 2.12         | 2.25        | 2.66         | -          |
| L-Glutamate[c]            | 39                  | 1.94                                                               | 1.76         | 2.12         | 2.24        | 1.81         | -          |
| L-Phenylalanine[c]        | 3                   | 1.73                                                               | 1.65         | 1.89         | 2.23        | 1.96         | -          |
| L-Histidine[c]            | 4                   | 0.71                                                               | 1.30         | 1.71         | 2.23        | 1.39         | -          |
| L-Isoleucine[c]           | 5                   | 1.19                                                               | 0.23         | 1.88         | 2.15        | 0.44         | -          |
| 1-(5-Phospho-D-ribose)-γ  | 2                   | 1.66                                                               | 1.80         | 2.07         | 2.11        | 2.09         | -          |
| Adenylyl sulfate[c]       | 3                   | 2.52                                                               | 2.11         | 1.78         | 2.05        | 2.35         | -          |
| Dethiobiotin[c]           | 1                   | 0.73                                                               | 1.19         | 1.68         | 2.04        | 2.20         | -          |
| Sulfur[c]                 | 1                   | 0.73                                                               | 1.19         | 1.68         | 2.04        | 2.20         | -          |
| 5-Deoxyadenosine[c]       | 1                   | 0.73                                                               | 1.19         | 1.68         | 2.04        | 2.20         | -          |
| H <sup>+</sup> [p]        | 4                   | -0.51                                                              | 0.86         | 1.77         | 2.01        | 1.06         | -          |
| L-Tyrosine[c]             | 6                   | 1.54                                                               | 0.57         | 1.69         | 1.98        | 1.13         | -          |
| S-Adenosylmethioninami    | 3                   | 0.44                                                               | 1.41         | 1.83         | 1.98        | 2.78         | -          |
| L-Citrulline[c]           | 2                   | 1.67                                                               | 2.11         | 2.07         | 1.98        | 0.64         | -          |
| 5-Hydroxyisourate[c]      | 2                   | 0.92                                                               | 1.75         | 1.94         | 1.97        | 1.86         | -          |
| L-Leucine[c]              | 4                   | 0.70                                                               | 0.72         | 1.79         | 1.92        | 0.99         | -          |
| N-Acetyl-L-glutamate 5-σ  | 2                   | 1.35                                                               | 1.69         | 1.23         | 1.92        | 2.14         | -          |
| 5-Methylthioadenosine[c]  | 3                   | 0.44                                                               | 1.62         | 1.61         | 1.90        | 3.00         | -          |
| L-Serine[m]               | 3                   | 0.55                                                               | -1.51        | 1.57         | 1.89        | -0.24        | -          |
| L-Glutamate[m]            | 9                   | 1.84                                                               | 1.54         | 2.18         | 1.87        | 0.31         | -          |
| Nicotinate[m]             | 1                   | 1.09                                                               | 1.60         | 1.65         | 1.85        | 2.13         | -          |
| Nicotinamide[c]           | 1                   | 1.09                                                               | 1.60         | 1.65         | 1.85        | 2.13         | -          |
| Nicotinamide[m]           | 1                   | 1.09                                                               | 1.60         | 1.65         | 1.85        | 2.13         | -          |
| L-Lysine[c]               | 4                   | -0.05                                                              | -0.02        | 1.21         | 1.84        | 0.27         | -          |
| L-Glutamine[m]            | 2                   | 0.94                                                               | -0.35        | 1.39         | 1.79        | 0.52         | -          |
| alpha-D-Ribose 1-phosph   | 2                   | 1.47                                                               | 1.63         | 1.75         | 1.78        | 2.08         | -          |
| (2S)-2-Isopropylmalate[c] | 2                   | 1.09                                                               | 0.86         | 1.33         | 1.78        | 1.44         | -          |
| L-Proline[m]              | 3                   | 0.80                                                               | 0.03         | 1.55         | 1.77        | -1.62        | -          |
| Uracil[c]                 | 3                   | -0.88                                                              | -1.13        | 1.59         | 1.75        | -0.15        | -          |
| L-Threonine[m]            | 2                   | 0.80                                                               | -0.59        | 1.44         | 1.74        | -0.40        | -          |
| tRNA(Tyr)[c]              | 1                   | 1.24                                                               | 1.26         | 1.37         | 1.72        | 1.87         | -          |
| L-Tyrosyl-tRNA(Tyr)[c]    | 1                   | 1.24                                                               | 1.26         | 1.37         | 1.72        | 1.87         | -          |
| 4-Phospho-L-aspartate[c]  | 2                   | 1.51                                                               | 1.68         | 1.77         | 1.71        | 2.26         | -          |
| Chitosan[e]               | 1                   | 0.79                                                               | -1.59        | 1.03         | 1.71        | 1.42         | -          |
| 3-Methyl-2-oxobutanoic a  | 4                   | 1.19                                                               | 1.12         | 1.58         | 1.70        | 1.99         | -          |
| (R)-Lactate[e]            | 1                   | 1.43                                                               | 1.34         | 1.70         | 1.68        | 2.07         | -          |
| (S)-Lactate[e]            | 1                   | 1.43                                                               | 1.34         | 1.70         | 1.68        | 2.07         | -          |
| Pyruvate[e]               | 1                   | 1.43                                                               | 1.34         | 1.70         | 1.68        | 2.07         | -          |
| 1,3-beta-D-Glucan[c]      | 2                   | -1.25                                                              | 0.16         | 1.14         | 1.66        | 1.62         | -          |
| L-Methionine[c]           | 8                   | 2.36                                                               | 0.59         | 1.08         | 1.63        | 0.15         | -          |
| Fatty acid[r]             | 1                   | 0.49                                                               | 1.31         | 1.25         | 1.62        | 1.52         | -          |
| Dihydroceramide[r]        | 1                   | 0.49                                                               | 1.31         | 1.25         | 1.62        | 1.52         | -          |
| (2R,3S)-3-Isopropylmalat  | 2                   | 1.31                                                               | 1.08         | 1.08         | 1.62        | 1.67         | -          |
| L-Lysine[e]               | 1                   | 0.45                                                               | 0.77         | 1.35         | 1.62        | 1.28         | -          |
| L-Asparagine[e]           | 1                   | 1.00                                                               | 0.83         | 1.29         | 1.62        | 0.97         | -          |
| L-Cysteine[e]             | 1                   | 1.00                                                               | 0.83         | 1.29         | 1.62        | 0.97         | -          |
| L-Glutamine[e]            | 1                   | 1.00                                                               | 0.83         | 1.29         | 1.62        | 0.97         | -          |
| L-Glutamate[e]            | 1                   | 1.00                                                               | 0.83         | 1.29         | 1.62        | 0.97         | -          |
| Glycine[e]                | 1                   | 1.00                                                               | 0.83         | 1.29         | 1.62        | 0.97         | -          |
| L-Histidine[e]            | 1                   | 1.00                                                               | 0.83         | 1.29         | 1.62        | 0.97         | -          |
| L-Isoleucine[e]           | 1                   | 1.00                                                               | 0.83         | 1.29         | 1.62        | 0.97         | -          |
| L-Leucine[e]              | 1                   | 1.00                                                               | 0.83         | 1.29         | 1.62        | 0.97         | -          |
| L-Ornithine[e]            | 1                   | 1.00                                                               | 0.83         | 1.29         | 1.62        | 0.97         | -          |
| L-Phenylalanine[e]        | 1                   | 1.00                                                               | 0.83         | 1.29         | 1.62        | 0.97         | -          |
| L-Serine[e]               | 1                   | 1.00                                                               | 0.83         | 1.29         | 1.62        | 0.97         | -          |
| L-Threonine[e]            | 1                   | 1.00                                                               | 0.83         | 1.29         | 1.62        | 0.97         | -          |
| L-Tryptophan[e]           | 1                   | 1.00                                                               | 0.83         | 1.29         | 1.62        | 0.97         | -          |
| L-Tyrosine[e]             | 1                   | 1.00                                                               | 0.83         | 1.29         | 1.62        | 0.97         | -          |
| L-Valine[e]               | 1                   | 1.00                                                               | 0.83         | 1.29         | 1.62        | 0.97         | -          |
| Methanol[p]               | 1                   | 1.88                                                               | 1.77         | 2.03         | 1.62        | 2.37         | -          |
| 2-Amino-4-hydroxy-6-(er)  | 1                   | 1.01                                                               | 0.96         | 1.36         | 1.62        | 1.73         | -          |
| Formamidopyrimidine nu    | 1                   | 1.01                                                               | 0.96         | 1.36         | 1.62        | 1.73         | -          |
| 2,5-Diamino-6-(5'-triphos | 1                   | 1.01                                                               | 0.96         | 1.36         | 1.62        | 1.73         | -          |
| 2,5-Diaminopyrimidine nu  | 1                   | 1.01                                                               | 0.96         | 1.36         | 1.62        | 1.73         | -          |
| AMP[c]                    | 44                  | 0.61                                                               | 0.21         | 0.78         | 1.61        | 1.36         | -          |
| tRNA(Glu)[c]              | 1                   | 1.30                                                               | 1.26         | 1.20         | 1.61        | 1.70         | -          |
| L-Glutamyl-tRNA(Glu)[c]   | 1                   | 1.30                                                               | 1.26         | 1.20         | 1.61        | 1.70         | -          |
| Spermine[c]               | 1                   | 1.22                                                               | 1.30         | 1.47         | 1.60        | 2.10         | -          |
| Spermidine[c]             | 1                   | 1.22                                                               | 1.30         | 1.47         | 1.60        | 2.10         | -          |
| H2O2[p]                   | 5                   | 1.49                                                               | 0.94         | 1.14         | 1.60        | 1.94         | -          |
| 3-Phosphonoxyypyruvate    | 2                   | 1.37                                                               | 1.60         | 1.73         | 1.60        | 2.40         | -          |

Condition 0.1 / 0.15, sorted by descending Z-score and compared with the Z-score of the other conditions

Z-scores are coloured in light yellow (Z-Score>1) until dark red (Z-Score > 2.5)

| #Feature                                                         | Reporter Metabolite | Condition D (h <sup>-1</sup> ) (D (h <sup>-1</sup> )) <sup>1</sup> | 0.015 / 0.15 | 0.025 / 0.15 | 0.05 / 0.15 | 0.075 / 0.15 | 0.1 / 0.15 | 0.125 / 0.15 |
|------------------------------------------------------------------|---------------------|--------------------------------------------------------------------|--------------|--------------|-------------|--------------|------------|--------------|
| Number of significantly regulated genes in the metabolic network |                     | 330                                                                | 313          | 259          | 175         | 66           | 0          |              |
| 5-Methylthioadenosine[c]                                         | 3                   | 0.44                                                               | 1.62         | 1.61         | 1.90        | 3.00         | -          |              |
| S-Adenosylmethioninami                                           | 3                   | 0.44                                                               | 1.41         | 1.83         | 1.98        | 2.78         | -          |              |
| UDP-glucose[c]                                                   | 6                   | 1.11                                                               | 1.46         | 2.26         | 2.51        | 2.57         | -          |              |
| 2-Oxobutanate[c]                                                 | 3                   | 1.95                                                               | 2.10         | 2.12         | 2.25        | 2.56         | -          |              |
| Phenylpyruvate[c]                                                | 3                   | -0.52                                                              | 0.72         | 0.93         | 0.90        | 2.47         | -          |              |
| Nicotinate[c]                                                    | 3                   | 1.41                                                               | 1.92         | 2.22         | 2.47        | 2.41         | -          |              |
| 3-Phosphoxypyruvate                                              | 2                   | 1.37                                                               | 1.60         | 1.73         | 1.60        | 2.40         | -          |              |
| Methanol[p]                                                      | 1                   | 1.88                                                               | 1.77         | 2.03         | 1.62        | 2.37         | -          |              |
| Adenylyl sulfate[c]                                              | 3                   | 2.62                                                               | 2.11         | 1.78         | 2.05        | 2.35         | -          |              |
| Acetate[e]                                                       | 2                   | 1.45                                                               | -0.07        | 1.77         | 2.28        | 2.35         | -          |              |
| Urate[c]                                                         | 2                   | 1.54                                                               | 1.98         | 1.92         | 1.41        | 2.26         | -          |              |
| 4-Phospho-L-aspartate[c]                                         | 2                   | 1.51                                                               | 1.68         | 1.77         | 1.71        | 2.26         | -          |              |
| Putrescine[c]                                                    | 2                   | 1.67                                                               | 1.61         | 1.69         | 1.48        | 2.25         | -          |              |
| Hypoxanthine[c]                                                  | 3                   | 1.56                                                               | 2.00         | 1.47         | 1.28        | 2.24         | -          |              |
| Dethiobiotin[c]                                                  | 1                   | 0.73                                                               | 1.19         | 1.68         | 2.04        | 2.20         | -          |              |
| Sulfur[c]                                                        | 1                   | 0.73                                                               | 1.19         | 1.68         | 2.04        | 2.20         | -          |              |
| 5-Deoxyadenosine[c]                                              | 1                   | 0.73                                                               | 1.19         | 1.68         | 2.04        | 2.20         | -          |              |
| Triacylglycerol[c]                                               | 3                   | 0.75                                                               | 1.51         | 1.39         | 1.46        | 2.18         | -          |              |
| Peptide 2-{3-carboxy-3-ai                                        | 1                   | 1.26                                                               | 1.21         | 1.49         | 1.59        | 2.18         | -          |              |
| Peptide 2-{3-carboxy-3-(r                                        | 1                   | 1.26                                                               | 1.21         | 1.49         | 1.59        | 2.18         | -          |              |
| L-Histidinol phosphate[c]                                        | 2                   | 0.99                                                               | 1.20         | 1.35         | 1.20        | 2.15         | -          |              |
| N-Acetyl-L-glutamate 5-s                                         | 2                   | 1.35                                                               | 1.69         | 1.23         | 1.92        | 2.14         | -          |              |
| Nicotinate[m]                                                    | 1                   | 1.09                                                               | 1.60         | 1.65         | 1.85        | 2.13         | -          |              |
| Nicotinamide[c]                                                  | 1                   | 1.09                                                               | 1.60         | 1.65         | 1.85        | 2.13         | -          |              |
| Nicotinamide[m]                                                  | 1                   | 1.09                                                               | 1.60         | 1.65         | 1.85        | 2.13         | -          |              |
| 1,2-Diacyl-sn-glycerol 3-φ                                       | 5                   | 1.25                                                               | 1.03         | 0.61         | 0.19        | 2.12         | -          |              |
| Spermidine[c]                                                    | 1                   | 1.22                                                               | 1.30         | 1.47         | 1.60        | 2.10         | -          |              |
| Spermidine[c]                                                    | 1                   | 1.22                                                               | 1.30         | 1.47         | 1.60        | 2.10         | -          |              |
| 1-(5-Phospho-D-ribosyl)-/                                        | 2                   | 1.66                                                               | 1.80         | 2.07         | 2.11        | 2.09         | -          |              |
| alpha-D-Ribose 1-phosph                                          | 2                   | 1.47                                                               | 1.63         | 1.75         | 1.78        | 2.08         | -          |              |
| Phenylacetaldehyde[c]                                            | 1                   | -0.25                                                              | -0.27        | -0.23        | -0.10       | 2.08         | -          |              |
| (R)-Lactate[e]                                                   | 1                   | 1.43                                                               | 1.34         | 1.70         | 1.68        | 2.07         | -          |              |
| (S)-Lactate[e]                                                   | 1                   | 1.43                                                               | 1.34         | 1.70         | 1.68        | 2.07         | -          |              |
| Pyruvate[e]                                                      | 1                   | 1.43                                                               | 1.34         | 1.70         | 1.68        | 2.07         | -          |              |
| Pyruvate[c]                                                      | 14                  | -0.27                                                              | 0.16         | 0.27         | 1.43        | 2.05         | -          |              |
| Aminopropylcadaverine[c]                                         | 1                   | 1.23                                                               | 1.31         | 1.53         | 1.56        | 2.02         | -          |              |
| 3-Methyl-2-oxobutanoic a                                         | 4                   | 1.19                                                               | 1.12         | 1.58         | 1.70        | 1.99         | -          |              |
| Peptide[c]                                                       | 2                   | 0.24                                                               | 1.31         | 1.57         | 1.41        | 1.98         | -          |              |
| L-Phenylalanine[c]                                               | 3                   | 1.73                                                               | 1.65         | 1.89         | 2.23        | 1.96         | -          |              |
| L-Cystathionine[c]                                               | 4                   | 0.32                                                               | 1.35         | 0.76         | 0.86        | 1.95         | -          |              |
| H2O2[p]                                                          | 5                   | 1.49                                                               | 0.94         | 1.14         | 1.60        | 1.94         | -          |              |
| (S)-Dihydroorotate[c]                                            | 1                   | 0.81                                                               | 1.23         | 1.21         | 1.42        | 1.93         | -          |              |
| S-Adenosyl-L-methionine                                          | 14                  | 1.86                                                               | 2.13         | 1.56         | 2.26        | 1.92         | -          |              |
| tRNA(His)[c]                                                     | 1                   | 1.20                                                               | 1.22         | 1.23         | 1.20        | 1.91         | -          |              |
| L-Histidyl-tRNA(His)[c]                                          | 1                   | 1.20                                                               | 1.22         | 1.23         | 1.20        | 1.91         | -          |              |
| L-Histidine[m]                                                   | 1                   | 1.20                                                               | 1.22         | 1.23         | 1.20        | 1.91         | -          |              |
| tRNA(His)[m]                                                     | 1                   | 1.20                                                               | 1.22         | 1.23         | 1.20        | 1.91         | -          |              |
| L-Histidyl-tRNA(His)[m]                                          | 1                   | 1.20                                                               | 1.22         | 1.23         | 1.20        | 1.91         | -          |              |
| (S)-Lactate[c]                                                   | 2                   | 1.70                                                               | 0.67         | 1.12         | 1.28        | 1.89         | -          |              |
| O-Phospho-L-serine[c]                                            | 2                   | 0.65                                                               | 1.36         | 1.44         | 1.32        | 1.88         | -          |              |
| N-(L-Arginino)succinate[c]                                       | 2                   | 0.61                                                               | 1.76         | 1.47         | 1.17        | 1.88         | -          |              |
| tRNA(Tyr)[c]                                                     | 1                   | 1.24                                                               | 1.26         | 1.37         | 1.72        | 1.87         | -          |              |
| L-Tyrosyl-tRNA(Tyr)[c]                                           | 1                   | 1.24                                                               | 1.26         | 1.37         | 1.72        | 1.87         | -          |              |
| (S)-Methylmalonate semi                                          | 1                   | 1.34                                                               | 0.82         | 1.01         | 0.85        | 1.86         | -          |              |
| 5-Hydroxysourate[c]                                              | 2                   | 0.92                                                               | 1.75         | 1.94         | 1.97        | 1.86         | -          |              |
| Palmitoyl-CoA[r]                                                 | 1                   | 1.19                                                               | 1.18         | 0.84         | 1.22        | 1.84         | -          |              |
| CoA[r]                                                           | 1                   | 1.19                                                               | 1.18         | 0.84         | 1.22        | 1.84         | -          |              |
| (R)-Lactate[c]                                                   | 3                   | 0.42                                                               | 0.46         | 0.07         | 0.76        | 1.83         | -          |              |
| (GlcNAc)2(Man)2(Asn)1[fr                                         | 1                   | 1.11                                                               | 1.15         | 1.25         | 1.38        | 1.83         | -          |              |
| (GlcNAc)2(Man)1(Asn)1[fr                                         | 1                   | 1.11                                                               | 1.15         | 1.25         | 1.38        | 1.83         | -          |              |
| G00309[v]                                                        | 1                   | 1.11                                                               | 1.15         | 1.25         | 1.38        | 1.83         | -          |              |
| G00319[v]                                                        | 1                   | 1.11                                                               | 1.15         | 1.25         | 1.38        | 1.83         | -          |              |
| D-Mannose[v]                                                     | 1                   | 1.11                                                               | 1.15         | 1.25         | 1.38        | 1.83         | -          |              |
| L-Glutamate[c]                                                   | 39                  | 1.94                                                               | 1.76         | 2.12         | 2.24        | 1.81         | -          |              |
| tRNA[c]                                                          | 1                   | 0.70                                                               | 0.76         | 0.95         | 1.36        | 1.77         | -          |              |
| tRNA containing 6-isoper                                         | 1                   | 0.70                                                               | 0.76         | 0.95         | 1.36        | 1.77         | -          |              |
| tRNA uridine[c]                                                  | 1                   | 1.04                                                               | 1.11         | 1.17         | 1.35        | 1.74         | -          |              |
| tRNA pseudouridine[c]                                            | 1                   | 1.04                                                               | 1.11         | 1.17         | 1.35        | 1.74         | -          |              |
| 2-Amino-4-hydroxy-6-(er)                                         | 1                   | 1.01                                                               | 0.96         | 1.36         | 1.62        | 1.73         | -          |              |
| Formamidopyrimidine nu                                           | 1                   | 1.01                                                               | 0.96         | 1.36         | 1.62        | 1.73         | -          |              |
| 2,5-Diamino-6-(5'-triphos)                                       | 1                   | 1.01                                                               | 0.96         | 1.36         | 1.62        | 1.73         | -          |              |
| 2,5-Diaminopyrimidine nu                                         | 1                   | 1.01                                                               | 0.96         | 1.36         | 1.62        | 1.73         | -          |              |
| O-Acetyl-L-homoserine[c]                                         | 3                   | -0.85                                                              | -0.33        | -0.98        | 0.59        | 1.71         | -          |              |
| beta-D-Glucose[c]                                                | 1                   | 1.39                                                               | 1.35         | 1.58         | 1.46        | 1.71         | -          |              |
| Cellobiose[c]                                                    | 1                   | 1.39                                                               | 1.35         | 1.58         | 1.46        | 1.71         | -          |              |
| Xanthosine 5'-phosphate[                                         | 1                   | 1.12                                                               | 1.15         | 0.83         | 0.84        | 1.70         | -          |              |
| tRNA(Glu)[c]                                                     | 1                   | 1.30                                                               | 1.26         | 1.20         | 1.61        | 1.70         | -          |              |
| L-Glutamyl-tRNA(Glu)[c]                                          | 1                   | 1.30                                                               | 1.26         | 1.20         | 1.61        | 1.70         | -          |              |
| Glutamyl-tRNA[m]                                                 | 1                   | 0.71                                                               | 1.09         | 1.02         | 1.12        | 1.67         | -          |              |
| L-Aspartyl-tRNA(Asn)[m]                                          | 1                   | 0.71                                                               | 1.09         | 1.02         | 1.12        | 1.67         | -          |              |
| L-Glutamyl-tRNA(Gln)[m]                                          | 1                   | 0.71                                                               | 1.09         | 1.02         | 1.12        | 1.67         | -          |              |
| Palmitoyl-CoA[p]                                                 | 3                   | 0.26                                                               | 0.83         | -0.02        | 0.97        | 1.67         | -          |              |
| Tetradecanoyl-CoA[p]                                             | 3                   | 0.26                                                               | 0.83         | -0.02        | 0.97        | 1.67         | -          |              |
| Dodecanoyl-CoA[p]                                                | 3                   | 0.26                                                               | 0.83         | -0.02        | 0.97        | 1.67         | -          |              |
| Amylose[c]                                                       | 2                   | 0.94                                                               | -0.39        | 1.19         | 1.36        | 1.67         | -          |              |
| (2R,3S)-3-Isopropylmalat                                         | 2                   | 1.31                                                               | 1.08         | 1.08         | 1.62        | 1.67         | -          |              |
| RNA[c]                                                           | 4                   | 1.29                                                               | 1.32         | 1.45         | 1.23        | 1.66         | -          |              |
| 2,3-Diketo-5-methylthio                                          | 2                   | 1.17                                                               | 0.99         | 1.11         | 1.45        | 1.66         | -          |              |
| H2O[e]                                                           | 2                   | 1.61                                                               | -0.35        | 1.27         | 1.37        | 1.64         | -          |              |
| 5-Phosphoribosylamine[c]                                         | 1                   | 0.74                                                               | 1.05         | 0.03         | 1.25        | 1.63         | -          |              |
| 1,3-beta-D-Glucan[c]                                             | 2                   | -1.25                                                              | 0.16         | 1.14         | 1.66        | 1.62         | -          |              |
| N-Acetyl-L-glutamate 5-p                                         | 1                   | 0.79                                                               | 1.34         | 0.87         | 1.35        | 1.62         | -          |              |
| L-Asparaginyl-tRNA(Asn)                                          | 2                   | 0.84                                                               | 1.00         | 1.21         | 1.37        | 1.61         | -          |              |
| 3-Oxoctadecanoyl-CoA[                                            | 2                   | -0.48                                                              | -0.38        | 0.60         | 1.04        | 1.60         | -          |              |
| 3-Oxopalmitoyl-CoA[p]                                            | 2                   | -0.48                                                              | -0.38        | 0.60         | 1.04        | 1.60         | -          |              |
| 3-Oxotetradecanoyl-CoA[                                          | 2                   | -0.48                                                              | -0.38        | 0.60         | 1.04        | 1.60         | -          |              |
| 3-Oxododecanoyl-CoA[p]                                           | 2                   | -0.48                                                              | -0.38        | 0.60         | 1.04        | 1.60         | -          |              |
| 3-Oxooctadecanoyl-CoA[p]                                         | 2                   | -0.48                                                              | -0.38        | 0.60         | 1.04        | 1.60         | -          |              |
| 3-Oxostearoyl-CoA[p]                                             | 2                   | -0.48                                                              | -0.38        | 0.60         | 1.04        | 1.60         | -          |              |
| Inosine[c]                                                       | 1                   | 0.78                                                               | 1.23         | 1.37         | 1.40        | 1.60         | -          |              |
| Deoxyguanosine[c]                                                | 1                   | 0.78                                                               | 1.23         | 1.37         | 1.40        | 1.60         | -          |              |
| 2-Deoxy-D-ribose 1-phos                                          | 1                   | 0.78                                                               | 1.23         | 1.37         | 1.40        | 1.60         | -          |              |
| Guanosine[c]                                                     | 1                   | 0.78                                                               | 1.23         | 1.37         | 1.40        | 1.60         | -          |              |
| Deoxyadenosine[c]                                                | 1                   | 0.78                                                               | 1.23         | 1.37         | 1.40        | 1.60         | -          |              |
| Deoxyinosine[c]                                                  | 1                   | 0.78                                                               | 1.23         | 1.37         | 1.40        | 1.60         | -          |              |
| Deoxyuridine[c]                                                  | 1                   | 0.78                                                               | 1.23         | 1.37         | 1.40        | 1.60         | -          |              |
| tRNA(Met)[m]                                                     | 1                   | 0.59                                                               | 0.64         | 0.66         | 0.90        | 1.60         | -          |              |

**Condition A\_B: 0.015/0.025; condition B\_C: 0.025/0.05**

Sorted for high Z-score in A\_B (&gt; 2) and low Z-score in B\_C (&lt; 2)

| #Feature                                    | Condition: A_B<br>Z-score | Condition: B_C<br>Z-score |
|---------------------------------------------|---------------------------|---------------------------|
| Fe2+[c]                                     | 3.55237                   | 0.981414                  |
| L-Alanine[c]                                | 3.0241                    | 0.682319                  |
| alpha-D-Glucose 1-phosphate[c]              | 2.86158                   | -0.302103                 |
| Fumarate[c]                                 | 2.84363                   | -0.525585                 |
| Biotin[c]                                   | 2.73901                   | 1.04075                   |
| Fe3+[c]                                     | 2.67409                   | 1.80295                   |
| (Indol-3-yl)acetamide[c]                    | 2.6238                    | -0.623151                 |
| sn-glycero-3-Phosphoethanolamine[c]         | 2.60404                   | 1.58571                   |
| (S)-Malate[c]                               | 2.60377                   | 0.242996                  |
| UDP-glucose[c]                              | 2.42272                   | -1.10989                  |
| L-Methionine[c]                             | 2.4199                    | 0.563615                  |
| L-Tryptophan[c]                             | 2.41599                   | 1.61105                   |
| 3-Hexaprenyl-4,5-dihydroxybenzoate[m]       | 2.36321                   | -0.623151                 |
| 3-Hexaprenyl-4-hydroxy-5-methoxybenzoate[m] | 2.36321                   | -0.623151                 |
| (S)-3-Hydroxydocosanoyl-CoA[p]              | 2.34544                   | 0.356819                  |
| (S)-3-Hydroxyeicosanoyl-CoA[p]              | 2.34544                   | 0.356819                  |
| (S)-3-Hydroxyoctadecanoyl-CoA[p]            | 2.34544                   | 0.356819                  |
| (S)-3-Hydroxyhexacosanoyl-CoA[p]            | 2.34544                   | 0.356819                  |
| (S)-3-Hydroxytetracosanoyl-CoA[p]           | 2.34544                   | 0.356819                  |
| (S)-3-Hydroxyhexadecanoyl-CoA[p]            | 2.34544                   | 0.356819                  |
| (S)-3-Hydroxytetradecanoyl-CoA[p]           | 2.34544                   | 0.356819                  |
| (S)-Hydroxydecanoyl-CoA[p]                  | 2.34544                   | 0.356819                  |
| (S)-Hydroxyhexanoyl-CoA[p]                  | 2.34544                   | 0.356819                  |
| (S)-3-Hydroxydodecanoyl-CoA[p]              | 2.34544                   | 0.356819                  |
| (S)-Hydroxyoctanoyl-CoA[p]                  | 2.34544                   | 0.356819                  |
| Oxaloacetate[p]                             | 2.33577                   | 1.73205                   |
| L-Methionine[e]                             | 2.25872                   | -0.623151                 |
| (S)-Malate[p]                               | 2.22363                   | 0.784573                  |
| 3-Sulfoypyruvate[c]                         | 2.21422                   | -0.623151                 |
| 3-Sulfolactate[c]                           | 2.21422                   | -0.623151                 |
| Acetaldehyde[m]                             | 2.18657                   | 1.60275                   |
| L-Ornithine[c]                              | 2.1816                    | 1.45438                   |
| Sphinganine[c]                              | 2.16153                   | 1.16975                   |
| L-Arginine[c]                               | 2.13642                   | 1.54853                   |
| Stearidonic acid[c]                         | 2.11356                   | 1.94105                   |
| Glyoxylate[c]                               | 2.10833                   | -0.273315                 |
| 3-Oxooctadecanoyl-CoA[p]                    | 2.10733                   | 0.356819                  |
| 3-Oxopalmitoyl-CoA[p]                       | 2.10733                   | 0.356819                  |
| 3-Oxotetradecanoyl-CoA[p]                   | 2.10733                   | 0.356819                  |
| 3-Oxodecanoyl-CoA[p]                        | 2.10733                   | 0.356819                  |
| 3-Oxododecanoyl-CoA[p]                      | 2.10733                   | 0.356819                  |
| 3-Oxoocatanoyl-CoA[p]                       | 2.10733                   | 0.356819                  |
| 2-Methylbutanal[c]                          | 2.10576                   | -0.623151                 |
| 1-Acyl-sn-glycero-3-phosphocholine[c]       | 2.09105                   | -0.881201                 |
| 1-Acyl-sn-glycero-3-phosphoethanolamine[c]  | 2.09105                   | -0.881201                 |
| 4-Fumarylacetoacetate[c]                    | 2.03303                   | -0.623151                 |
| Acetoacetate[c]                             | 2.03303                   | -0.623151                 |
| Dihydroceramide[c]                          | 2.03288                   | 1.62822                   |
| O-Acetylcarnitine[m]                        | 2.03007                   | 1.85003                   |
| Carnitine[m]                                | 2.03007                   | 1.85003                   |
| alpha-D-Glucose[e]                          | 2.02812                   | 1.02054                   |
| Carnitine[c]                                | 2.02233                   | 0.81801                   |
| H+[p]                                       | 2.01327                   | 0.807558                  |
| L-Citrulline[c]                             | 2.58043                   | 2.61956                   |
| N-(L-Arginino)succinate[c]                  | 2.46255                   | 2.14143                   |

The last two lines were included as they relate to the upregulated part of the arginine pathway
